# Supplementary material for: Virus infection is controlled by hematopoietic and stromal cell sensing of murine cytomegalovirus through STING
Source: eLife. 2020 Jul 29;9:e56882. doi: 10.7554/eLife.56882 (PMC7413665; doi:10.7554/eLife.56882)
Supplement: Figure 1—source data 1. [file elife-56882-fig1-data1.xlsx]

## Sheet: Figure1A
Days	Wildtype													STING GT																						MyD88 KO										DKO
0	100	100	100	100	100	100	100	100	100	100	100	100		100	100	100	100	100	100	100	100	100	100	100	100	100	100	100	100	100	100	100	100	100		100	100	100	100	100	100	100	100	100		100	100	100	100
1	103.382	103.483	102.26	101.765	103.96	98.3957	90.6404							101.058	100	100.588	100	100	99.495	100.578	103.125	101.702	101.754	100.922	100	106.311	99.5169									102.885	101.456	98.9796								99.0476	103.049	102.01	101.5
2	100.483	99.5025	99.435	98.2353	98.5148	95.1872	89.6552	93.4426	92.3445	93.9698	92.8962	92.8571		95.7672	95.4286	96.4706	96	95.977	94.4444	96.5318	99.5536	99.5745	99.1228	99.0783	97.9167	97.5728	93.2367	89.4737	92.3445	92.8205	94.7155	95.3307	95.8333	95.5556		102.885	105.825	99.4898	102.404	97.2973	101.596	101.942	102.162	98.8889		98.5714	101.219	99.4975	97
3	93.2367	93.5323	92.6554	92.9412	92.5743	92.5134	85.7143	86.8852	88.9952	88.9447	91.2568	87.2449		90.4762	91.4286	93.5294	88.5714	86.7816	91.4141	86.7052	92.8571	92.766	91.2281	94.0092	91.6667	93.6893	88.8889	84.2105	84.2105	85.641	89.4309	90.6615	89.1667	86.2222		96.6346	100.971	95.9184	95.6731	93.6937	94.6809	99.0291	94.0541	93.8889		95.7143	96.3415	97.4874	91.8
4	94.2029	93.5323	90.9604	91.7647	89.604	90.9091	85.2217	89.6175	91.3876	91.9598	93.4426	89.7959		92.0635	94.2857	88.2353	86.2857	87.931	80.8081	82.659	88.3929	89.7872	87.2807	89.4009	90	91.2621	87.9227	82.7751	80.3828	84.1026	89.0244	92.2179	87.5	82.6667		94.2308	97.5728	91.8367	93.2692	87.8378	89.3617	100	88.1081	89.4444		98.0952	89.6342	95.4774	90.5
5	96.1353	96.5174	92.6554	94.1176	90.5941	90.9091	86.2069	95.6284	96.1723	94.9749	94.5355	94.898		96.2963	97.1429	90	89.1429	86.7816	79.798	79.1907	87.9464	86.8085	85.9649	88.4793	90.4167	87.3786	90.3382	84.689	78.4689	82.0513	89.8374	93.7743	88.3333	84.8889		87.0192	95.1456	88.2653	87.0192	81.5315	84.0426	104.854	80.5405	88.3333		99.0476	84.1463	92.9648	83.5
6	101.449	101.99	103.955	102.941	99.0099	99.4652	92.6108	97.8142	98.0861	98.4925	97.2678	98.4694		102.116	100.571	100	97.1429	100	85.3535	83.815	91.0714	93.617	87.7193	95.8525	94.1667	95.6311	99.5169	88.9952	83.7321	86.1539	97.1545	97.2763	92.5	89.3333		84.1346	98.5437	84.1837	84.1346		84.5745	108.252	80.5405	93.8889		100.952	80.4878	97.9899	76
7	103.382	100	104.52	103.529	99.0099	98.9305	93.5961	102.186	101.435	102.513	100.546	98.9796		99.4709	97.7143	101.765	96	99.4253	89.3939	87.2832	93.3036	94.4681	88.5965	95.8525	93.75	96.6019	96.1353	94.7368	92.3445	90.7692	99.5935	100	97.0833	96		79.3269	100.971	81.1225	82.6923			106.796		93.8889		101.429		96.4824
8	106.763	102.488	105.65	104.118	102.97	103.743	96.0591	101.093	104.306	101.005	101.093	96.9388		101.058	101.143	102.941	98.2857	102.299	92.4242	93.0636	95.0893	95.3191	92.1053	95.8525	95	99.0291	97.5845	98.0861	95.6938	92.3077	97.561	98.8327	97.5	98.2222		79.3269	103.398	85.7143	87.5			107.282		96.1111		100.476		97.4874
9	106.28	104.48	105.085	106.471	103.96	104.813	99.0148	100.55	101.914	102.513	99.4536	99.4898		102.65	101.14	101.177	99.4286	102.299	93.9394	96.5318	98.2143	97.8723	95.614	99.5392	98.75	99.5146	93.7198	99.5215	96.6507	94.8718	97.9675	98.8327	96.6667	99.1111		80.77	105.83	91.84	90.3846			106.311		96.6667		101.43		100.502
10	104.34	101.49	107.91	107.647	103.96	105.348	96.0591	103.279	100	103.015	102.732	100.51		103.17	98.86	102.941	98.2857	103.448	94.9495	100.578	100.446	99.1489	96.0526	101.382	100.417	100	94.686	100	98.0861	95.8974	94.7155	98.4436	97.0833	97.3333		81.73	103.4	93.37	90.8654			105.825		96.6667		99.05		101.507
[truncated: 10 more columns]

## Sheet: Figure1B
Days	WT	Sting GT	MyD88 KO	DKO
21			0
21	0
21	0
21			0
21			0
21				0
21		0
7				1
21		0
21	0
21	0
21	0
21	0
21	0
21		0
21		0
21		0
21		0
21		0
21		0
21		0
7				1
21				0
8				1
8				1
21				0
6				1
6			1
21	0
21			0
21	0
21			0
21	0
21	0
7			1
21			0
7			1
21			0
21	0
21	0
21	0
21	0
21	0
21		0
21		0
21		0
21		0
21		0
21		0
21		0
21		0
21		0
21	0
21			0
6			0
6			1
6			1
21			0
7			1
21			0
7				1
21				0
6				1
21				0
6				1
6				1
6				1
6				1
6				1
5				1
21				0
6				1
