# Supplementary material for: Virus infection is controlled by hematopoietic and stromal cell sensing of murine cytomegalovirus through STING
Source: eLife. 2020 Jul 29;9:e56882. doi: 10.7554/eLife.56882 (PMC7413665; doi:10.7554/eLife.56882)
Supplement: Figure 2—source data 1. [file elife-56882-fig2-data1.xlsx]

## Sheet: Figure2
Figure 2A - Day2 - Spleen					Figure 2A - Day2 - Liver
WT	STING gt	MyD88 KO	DKO		WT	STING gt	MyD88 KO	DKO
1.93	2.03	3.14	3.61		3.38	3.34	3.56	3.32
1.42	2.08	1.83	2.89		3.06	3.11	3.17	3.31
2.46	2.24	2.38	2.91		3.33	3.01	3.48	3.25
3.24	1.28	1.57	3.57		3.49	2.9	3.22	3.72
1.62	2.55	3.08	2.16		3.45	3.14	3.69	3.42
1.58	2.04	1.73	3.8		3.06	3.12	3.45	3.52
1.11	1.58	2.81	3.47		3.06	2.66	3.59	3.58
2.05	1.98				3.49	3.54
0.94	1.49				2.75	3.24
1.23	3.15				2.78	3.52
1.28	2.77				3.19	3.71
0.78	0.83				2.94	2.77
0	1.07				2.26	3.35
0	0.37				3.67	2.64
1.37					3.5
0.65					2.95
0.06					2.64
Figure 2B - Day5 - Spleen					Figure 2B - Day5 - Liver
WT	STING gt	MyD88 KO	DKO		WT	STING gt	MyD88 KO	DKO
0.94	1.1	3.53	4.62		2.23	2.58	3.54	2.11
0.85	1.14	1.6	4.2		1.43	2.38	1.27	4.64
0.68	1.53	1.13	4.57		1.16	3.34	2.07	4.98
1.01	1.41	3.09	3.38		1.05	2.18	3.94	4.51
0.58	0.91	3.12	3.99		2.32	2.71	3.06	4
0.85	0.68	2.43	3.98		1.8	2.53	4.05	4.38
0.11	0.74	3.42	2.82		1.26	2.47	3.95	3.5
0.35	0.75	2.12			1.76	0.86	3.98
0.55	0.45	1.38			2.05	2	2.93
	0.48	2.31				1.75	3.93
		4.3					4.48
Figure2C - Spleen
WT	WT	WT	WT		STING GT	STING GT	STING GT	STING GT	Host
WT	MyD88 KO	STING GT	DKO		WT	MyD88 KO	STING GT	DKO	BoneMarrow
0.264203	2.76587	0.258622	3.11169		0.185224	3.41318	0.415692	3.75626
0.21949	1.77909	0.0648248	0.723109		0.219779	2.15328	0.272751	4.21795
0.176693	1.11764	0.389743	3.40307		0	2.34416	0.289088	4.11745
1.526	1.051	0	1.269		0	1.326	0	3.181
1.101	0.624	0	2.76		0	1.228	0.14	3.766
1.727	2.25	0	1.517			1.566	0	3.614
			1.796
Figure2C - Liver
WT	WT	WT	WT		STING GT	STING GT	STING GT	STING GT	Host
WT	MyD88 KO	STING GT	DKO		WT	MyD88 KO	STING GT	DKO	BoneMarrow
2.38033	3.99917	1.71112	3.75172		2.53438	4.09499	2.37098	4.49726
2.00031	3.14883	2.31768	1.59808		2.4461	3.97257	2.04662	4.99998
1.54469	2.70075	2.53431	3.83237		2.037	3.91856	2.00396	4.11659
1.926	2.685	0.847	3.349		2.2	4.181	2.172	4.258
1.1228	2.931	1.355	3.486		2.045	3.932	1.806	4.511
2.202	3.705	1.422	2.992			4.046	1.431	4.668
			2.928
