# Supplementary material for: Virus infection is controlled by hematopoietic and stromal cell sensing of murine cytomegalovirus through STING
Source: eLife. 2020 Jul 29;9:e56882. doi: 10.7554/eLife.56882 (PMC7413665; doi:10.7554/eLife.56882)
Supplement: Figure 3—source data 1. [file elife-56882-fig3-data1.xlsx]

## Sheet: Figure3
Figure 3B
CD45-
IFNB				IFNA
Mock	MCMV/GFP-	MCMV/GFP+		Mock	MCMV/GFP-	MCMV/GFP+
0.0513705	4.8251	31.2202		1.59077	51.2676	1309.56
0.140002	4.76068	65.1053		29.2686	77.0404	1476.08
0.115593	2.12146	60.4893		2.04838	62.5202	2663.57
CD45+CD11C+
IFNB				IFNA
Mock	MCMV/GFP-	MCMV/GFP+		Mock	MCMV/GFP-	MCMV/GFP+
0.710759	41.5826	172.536		82.7222	1327.41	1923.26
2.96732	54.6272	373.551		339.476	1298.88	1937.59
0.023228	51.8902	227.696		0.595969	1949.9	1585.64
