# Supplementary material for: Virus infection is controlled by hematopoietic and stromal cell sensing of murine cytomegalovirus through STING
Source: eLife. 2020 Jul 29;9:e56882. doi: 10.7554/eLife.56882 (PMC7413665; doi:10.7554/eLife.56882)
Supplement: Figure 4—source data 1. [file elife-56882-fig4-data1.xlsx]

## Sheet: Figure4
cDC
uninfected	WT	MyD88	STING GT	DKO
0.00375	0.77	0.37	0.31	0.08
0	0.29	0.24	0.3	0.1
0	0.42	0.12	0.38	0.2
0	0.2	0.19	0.33	0.17
pDC
uninfected	WT	MyD88	STING GT	DKO
0	23.7	0.071	16.3	0.64
0	22.8	0	13	0.79
0	10.1	0.23	24.8	0.51
0	9.97	0.19	30.4	0.38
CD45-
uninfected	WT	MyD88	STING GT	DKO
0	0.072	0.23	0	0.024
0	0.1	0.12	0.067	0.022
0	0.032	0.00666	0.028	0
0.014	0.012	0.00876	0	0
