# Supplementary material for: Virus infection is controlled by hematopoietic and stromal cell sensing of murine cytomegalovirus through STING
Source: eLife. 2020 Jul 29;9:e56882. doi: 10.7554/eLife.56882 (PMC7413665; doi:10.7554/eLife.56882)
Supplement: Figure 5—source data 1. [file elife-56882-fig5-data1.xlsx]

## Sheet: Figure5
Figure 5a - Splenic fibroblasts
mock	MCMV
1.27	7520.78
0.46	8060.57
1.73	7316.12
Figure 5b - MyD88xTRIF
WT-mock	WT-MCMV	KO-mock	KO-MCMV
1.98	1187.19	0.37	1290.16
0.67	715.76	0.21	1100.03
0.98	715.76	0.25	912.28
1.73	1787.01
0.92	1212.13
0.48	1123.15
Figure 5b - IRF3x7
WT-mock	WT-MCMV	KO-mock	KO-MCMV
0.46	7332	5.94	222.86
2.07	6038	2.28	209.38
1.05	6936	2.91	254.23
Figure 5b - TBK1
WT-mock	WT-MCMV	HET-mock	HET-MCMV	KO-mock	KO-MCMV
0.81	2876.3	0.09	1606.83	0.51	203.66
1.35	2401.97	5.5	8779.97	1.57	192.67
0.92	2120.22	2.36	1251.98	1.07	328.56
		1.02	1698.48
		1.35	1858.6
		0.99	1584.71
Figure 5b - STING KO
WT-mock	WT-MCMV	KO-mock	KO-MCMV
1	680.34	4.08	64.09
3.36	667.94	2.38	70.99
Figure 5b - STING GT
WT-mock	WT-MCMV	GT-mock	GT-MCMV
0.68	768.02	0.51	9.53
0.3	606.77	0.36	3.21
2.82	423.14
1.47	489.44
Figure 5b - MAVS
WT-mock	WT-MCMV	KO-mock	KO-MCMV
1	1684.66	0.97	1382
1.02	1111.48	5.23	3152.7
Figure 5b - SCID
WT-mock	WT-MCMV	KO-mock	KO-MCMV
0.48	1546.72	4.07	3603.4
2.09	1801.52	63.34	5423.47
0.64	2127.58	2.49	3808.48
1.54	1140.14	1.95	4656.4
Figure 5b - cGAS
WT-mock	WT-MCMV	KO-mock	KO-MCMV
1.21	1447.14	1.79	28.7
0.82	1339.93	4.01	32.05
	2588.45
	2245.79
Figure 5C - cGAS SFB
WT-mock	WT-MCMV	KO-mock	KO-MCMV
1.155	5840	209.211	0.336
0.844	5331	85.48	0.321
	4867	0	0.505
	4463	1.226	0.306
Figure 5D - IFNB ELISA
WT	WT	STING GT	STING GT	cGAS KO	cGAS KO
mock	MCMV	mock	MCMV	mock	MCMV
6.25	149.62	11.83	2.07	5.32	6.719
2.3	123.57	2.77	12.77	3.23	15.32
5.09	182.51
0	190.37
