# Supplementary material for: Virus infection is controlled by hematopoietic and stromal cell sensing of murine cytomegalovirus through STING
Source: eLife. 2020 Jul 29;9:e56882. doi: 10.7554/eLife.56882 (PMC7413665; doi:10.7554/eLife.56882)
Supplement: Figure 6—source data 1. [file elife-56882-fig6-data1.xlsx]

## Sheet: Figure6
Figure 6B - GranzymeB
WT	WT	STING GT	MyD88 KO	DKO
Mock	MCMV	MCMV	MCMV	MCMV
815	16916	17802	4491	4219
	12978	14985	2144	2113
	11192	13518	2644	2592
	10502	16850	2429	1227
	7591			896
	7897			1470
Figure 6B - Perforin
WT	WT	STING GT	MyD88 KO	DKO
Mock	MCMV	MCMV	MCMV	MCMV
36.8	153	156	109	65.9
	128	161	57.6	78.9
	124	149	73.6	83.6
	138	150	68.2	64.1
	104			75
	98.1			73
Figure 6B - IFNg
WT	WT	STING GT	MyD88 KO	DKO
Mock	MCMV	MCMV	MCMV	MCMV
0.54	29.6	43.7	3.07	3.88
	25.9	51	1.5	1.21
	27.9	46.8	0.85	5.03
	29.8	62.3	0.88	1.08
	33.3	31		0.83
	18.71	47.7		2.09
	18.4	34.9
Figure 6C - m157
WT	WT	STING GT	MyD88 KO	DKO
Mock	MCMV	MCMV	MCMV	MCMV
57.48	78.16	72.7	84.28	49.82
45.76	80.98	72.279	85.24	57.78
	76.04	70.93	83.9
			81.98
Figure 6C - MHC-I-
WT	WT	STING GT	MyD88 KO	DKO
Mock	MCMV	MCMV	MCMV	MCMV
38.4	89.96	88.98	93.53	63.6
16.1	87.76	86.38	91.85	75.7
	79.88	84.71	94.68
			94.69
